# Supplementary material for: Inflammatory risk of albumin combined with C-reactive protein predicts long-term cardiovascular risk in patients with diabetes
Source: publisher site journal article supplement (doi:10.18632/aging.205709), 2024-03-29
Supplement: Supplementary file [file aging-v16i7-205709-supplementary-material-SD1.pdf]

## SUPPLEMENTARY APPENDIX 1

### Diagnostic basis for diseases included in this study

#### *Hypertension*

Includes history of hypertension diagnosed by the doctor, high systolic blood pressure ( $\geq 140$  mmHg) or high diastolic blood pressure ( $\geq 90$  mmHg), use of antihypertensive drugs, or final death due to hypertension.

#### *Hyperlipidemia*

Includes total cholesterol  $\geq 5.7$  mmol/L, or triglyceride  $\geq 1.65$  mmol/L.

#### *Cardiovascular disease*

Cardiovascular disease is identified as a combination of standardized medical status questionnaires administered during self-reported physician diagnosis and personal interviews, including congestive heart failure, coronary heart disease, angina pectoris, heart attack, and stroke.

#### *Chronic pulmonary disease*

Chronic pulmonary disease is identified as a combination of standardized medical status questionnaires administered during self-reported physician diagnosis and personal interviews, including asthma, emphysema, and chronic bronchitis.

#### *Arthritis*

Arthritis is identified as a combination of standardized medical status questionnaires administered during self-reported physician diagnosis and personal interviews.

#### *Cancer*

Cancer is identified as a combination of standardized medical status questionnaires administered during self-reported physician diagnosis and personal interviews.

#### *Liver dysfunction*

Liver dysfunction is identified as a combination of standardized medical status questionnaires administered during self-reported physician diagnosis and personal interviews, and the value of alanine aminotransferase  $\geq 150$  U/L.

#### *Moderate or severe nephropathy*

Moderate/severe nephropathy is defined as  $\text{GFR} < 60 \text{ min} \times 1.73 \text{ m}^2$ , the calculation of GFR refers to the method of Levey et al. (<https://doi.org/10.7326/0003-4819-130-6-199903160-00002>).
