# Supplementary material for: Inflammatory risk of albumin combined with C-reactive protein predicts long-term cardiovascular risk in patients with diabetes
Source: publisher site journal article supplement (doi:10.18632/aging.205709), 2024-03-29
Supplement: Supplementary file [file aging-v16i7-205709-supplementary-material-SD2.pdf]

## SUPPLEMENTARY FIGURE

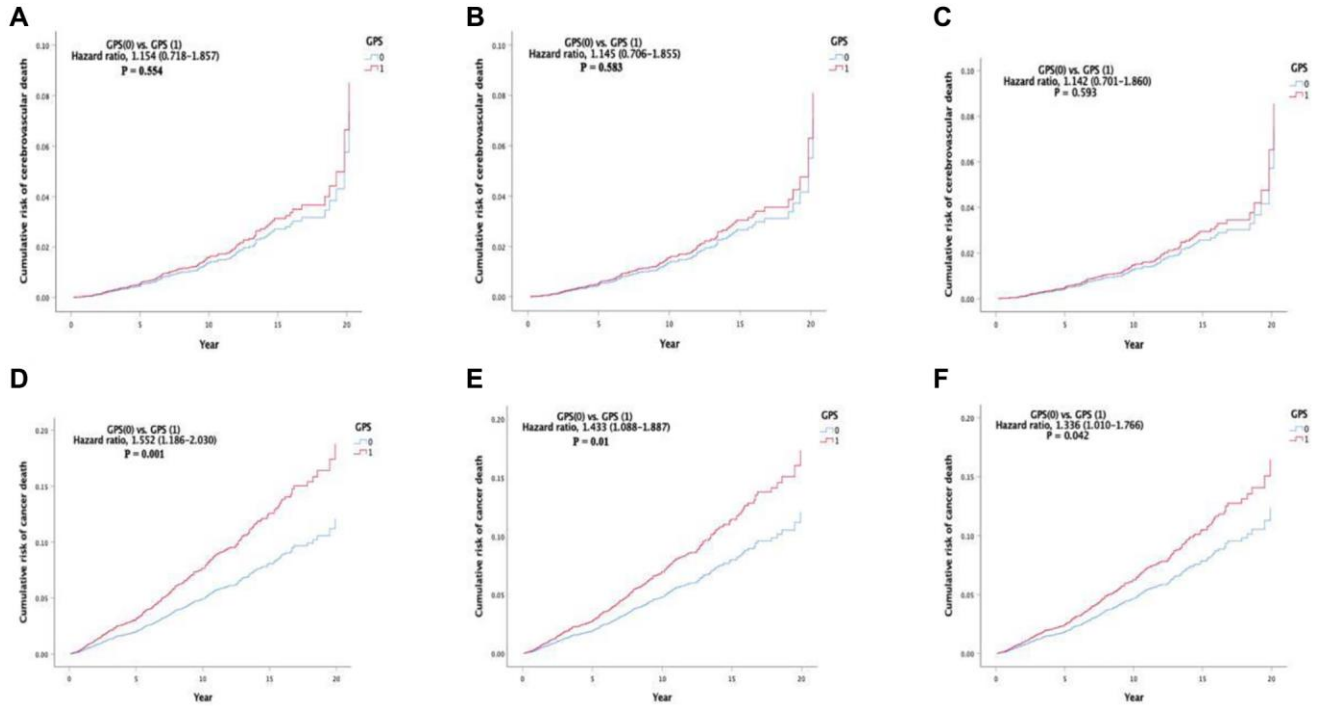

**Supplementary Figure 1. Cumulative incidence of the supplemental secondary outcomes in different models 3.** (A) Cumulative risk of cerebrovascular death in model 1. (B) Cumulative risk of cerebrovascular death in model 2. (C) Cumulative risk of cerebrovascular death in model 3. (D) cumulative risk of cancer death in model 1. (E) Cumulative risk of cancer death in model 2. (F) Cumulative risk of cancer death in model 3. Abbreviation: GPS: Glasgow Prognostic Score.
