# Supplementary material for: Inflammatory risk of albumin combined with C-reactive protein predicts long-term cardiovascular risk in patients with diabetes
Source: publisher site journal article supplement (doi:10.18632/aging.205709), 2024-03-29
Supplement: Supplementary file [file aging-v16i7-205709-supplementary-material-SD3.pdf]

## SUPPLEMENTARY TABLES

**Supplementary Table 1. Statistics of missing value and extremes<sup>a</sup>.**

|                            | N    | Mean   | Std. deviation | Missing |         | No. of extremes <sup>a</sup> |      |
|----------------------------|------|--------|----------------|---------|---------|------------------------------|------|
|                            |      |        |                | Count   | Percent | Low                          | High |
| PERMTH_INT                 | 4956 | 129.47 | 59.07          | 0       | 0       | 112                          | 12   |
| BMI, kg/m <sup>2</sup>     | 4562 | 31.81  | 7.273          | 394     | 7.9     | 5                            | 181  |
| CRP, mg/L                  | 4499 | 6.50   | 11.834         | 457     | 9.2     | 0                            | 119  |
| Age, years                 | 4956 | 61.96  | 14.348         | 0       | 0       | 198                          | 0    |
| Glucose, mmol/l            | 4452 | 8.48   | 3.942          | 504     | 10.2    | 0                            | 231  |
| HbA1c, no.                 | 4548 | 7.26   | 1.786          | 408     | 8.2     | 0                            | 272  |
| HDL, mmol/L                | 4471 | 1.24   | 0.370          | 485     | 9.8     | 12                           | 192  |
| Serum albumin, g/L         | 4452 | 41.29  | 3.471          | 504     | 10.2    | 140                          | 60   |
| ALT, U/L                   | 4439 | 27.29  | 24.830         | 517     | 10.4    | 0                            | 115  |
| BUN, mmol/L                | 4450 | 5.84   | 3.090          | 506     | 10.2    | 0                            | 182  |
| Tch, mmol/L                | 4451 | 5.03   | 1.218          | 505     | 10.2    | 20                           | 154  |
| TG, mmol/L                 | 4448 | 2.26   | 2.172          | 508     | 10.3    | 0                            | 108  |
| Creatinine, μ mol/L        | 4451 | 88.90  | 60.865         | 505     | 10.2    | 0                            | 83   |
| Cardiovascular death, no.  | 4956 |        |                | 0       | 0       |                              |      |
| All-cause death, no.       | 4956 |        |                | 0       | 0       |                              |      |
| Cerebrovascular death, no. | 4956 |        |                | 0       | 0       |                              |      |
| Cancer death, no.          | 4956 |        |                | 0       | 0       |                              |      |
| Smoking, no.               | 4914 |        |                | 42      | 0.8     |                              |      |
| Hypertension, no.          | 4944 |        |                | 12      | 0.2     |                              |      |
| Gender, no.                | 4956 |        |                | 0       | 0       |                              |      |
| Education status, no. (%)  | 4908 |        |                | 48      | 1       |                              |      |
| PIR, no.                   | 4956 |        |                | 0       | 0       |                              |      |
| Race, no.                  | 4956 |        |                | 0       | 0       |                              |      |
| Insulin, no.               | 4921 |        |                | 35      | 0.7     |                              |      |
| Diabetes pills, no.        | 3771 |        |                | 1185    | 23.9    |                              |      |
| Asthma, no.                | 4952 |        |                | 4       | 0.1     |                              |      |
| Arthritis, no.             | 4912 |        |                | 44      | 0.9     |                              |      |
| CVD                        | 4921 |        |                | 35      | 0.7     |                              |      |
| Emphysema, no.             | 4909 |        |                | 47      | 0.9     |                              |      |
| Chronic bronchitis, no.    | 4906 |        |                | 50      | 1.0     |                              |      |
| Liver dysfunction, no.     | 4901 |        |                | 55      | 1.1     |                              |      |
| Cancer, no.                | 4909 |        |                | 47      | 0.9     |                              |      |
| Alcohol consumption, no.   | 4956 |        |                | 0       | 0       |                              |      |

<sup>a</sup>Number of cases outside the range (Q1 – 1.5 × IQR, Q3 + 1.5 × IQR). Abbreviations: ALT: alanine aminotransferase; BMI: body mass index; BUN: blood urea nitrogen; CRP: C reactive protein; CVD: cardiovascular disease; HbA1c: glycated hemoglobin; HDL: high-density lipoprotein; PIR: poverty-income ratio; Tch: total cholesterol; TG: triglyceride.

**Supplementary Table 2. Cox regression analysis for the supplementary secondary outcomes.**

| Outcomes                  | GPS, HR (95% CI)  |                     |
|---------------------------|-------------------|---------------------|
|                           | 0                 | 1                   |
| Cerebrovascular mortality |                   |                     |
| Model 1                   | 1.000 (Reference) | 1.154 (0.718–1.857) |
| <i>P</i> -Value           |                   | 0.554               |
| Model 2                   | 1.000 (Reference) | 1.145 (0.706–1.855) |
| <i>P</i> -Value           |                   | 0.583               |
| Model 3                   | 1.000 (Reference) | 1.142 (0.701–1.860) |
| <i>P</i> -Value           |                   | 0.593               |
| Cancer mortality          |                   |                     |
| Model 1                   | 1.000 (Reference) | 1.552 (1.186–2.030) |
| <i>P</i> -Value           |                   | 0.001               |
| Model 2                   | 1.000 (Reference) | 1.433 (1.088–1.887) |
| <i>P</i> -Value           |                   | 0.01                |
| Model 3                   | 1.000 (Reference) | 1.336 (1.010–1.766) |
| <i>P</i> -Value           |                   | 0.042               |

Model 1 is adjusted for age, sex, and race. Model 2 is adjusted for variables in Model 1 + education status, smoking, drinking, poverty-income ratio, and body mass index. Model 3 is adjusted for variables in Model 2 + glycated hemoglobin, cardiovascular disease, hyperlipidemia, hypertension, chronic pulmonary disease, liver disease, arthritis, cancer, and moderate to severe nephropathy. Abbreviations: CI: confidence interval; GPS: Glasgow Prognostic Score; HR: hazard ratio.

**Supplementary Table 3. Cox regression analysis for the post-hoc analysis outcomes.**

| Outcomes                  | PLR, HR (95% CI)  |                     | NLR, HR (95% CI)  |                     |
|---------------------------|-------------------|---------------------|-------------------|---------------------|
|                           | 0                 | 1                   | 0                 | 1                   |
| Cardiovascular mortality  |                   |                     |                   |                     |
| Model 3                   | 1.000 (Reference) | 0.969 (0.823–1.140) | 1.000 (Reference) | 1.455 (1.229–1.722) |
| <i>P</i> -Value           |                   | 0.704               |                   | <0.001              |
| All-cause mortality       |                   |                     |                   |                     |
| Model 3                   | 1.000 (Reference) | 0.913 (0.839–0.995) | 1.000 (Reference) | 1.516 (1.388–1.657) |
| <i>P</i> -Value           |                   | 0.037               |                   | <0.001              |
| Cerebrovascular mortality |                   |                     |                   |                     |
| Model 3                   | 1.000 (Reference) | 0.718 (0.514–1.004) | 1.000 (Reference) | 0.993 (0.707–1.395) |
| <i>P</i> -Value           |                   | 0.053               |                   | 0.968               |
| Cancer mortality          |                   |                     |                   |                     |
| Model 3                   | 1.000 (Reference) | 1.003 (0.813–1.239) | 1.000 (Reference) | 1.314 (1.058–1.632) |
| <i>P</i> -Value           |                   | 0.975               |                   | 0.014               |

Model 3 is adjusted for age, sex, race, education status, smoking, drinking, poverty-income ratio, body mass index, glycated hemoglobin, cardiovascular disease, hyperlipidemia, hypertension, chronic pulmonary disease, liver disease, arthritis, cancer, and moderate to severe nephropathy. Abbreviations: CI: confidence interval; NLR: neutrophil-to-lymphocyte ratio; PLR: platelet-to-lymphocyte ratio; HR: hazard ratio.
